# Supplementary material for: Antiferromagnetic textures in BiFeO3 controlled by strain and electric field
Source: Nat Commun. 2020 Apr 6;11:1704. doi: 10.1038/s41467-020-15501-8 (PMC7136242; doi:10.1038/s41467-020-15501-8)
Supplement: Supplementary file 1 — Supplementary Information [file 41467_2020_15501_MOESM1_ESM.pdf]

## Supplementary Information for

# Antiferromagnetic textures in BiFeO<sub>3</sub> controlled by strain and electric field

A. Haykal<sup>1\*</sup>, J. Fischer<sup>2\*</sup>, W. Akhtar<sup>1\*\*\*</sup>, J.-Y. Chauleau<sup>3</sup>, D. Sando<sup>4</sup>, A. Finco<sup>1</sup>, F. Godel<sup>2</sup>, Y.A. Birkhölzer<sup>5</sup>  
C. Carrétéro<sup>2</sup>, N. Jaouen<sup>6</sup>, M. Bibes<sup>2</sup>, M. Viret<sup>3</sup>, S. Fusil<sup>2,7\*\*</sup>, V. Jacques<sup>1</sup>, V. Garcia<sup>2</sup>

<sup>1</sup>Laboratoire Charles Coulomb, Université de Montpellier and CNRS, 34095 Montpellier, France

<sup>2</sup>Unité Mixte de Physique, CNRS, Thales, Université Paris-Saclay, 91767 Palaiseau, France

<sup>3</sup>SPEC, CEA, CNRS, Université Paris-Saclay, 91191 Gif-sur-Yvette, France

<sup>4</sup>School of Materials Science and Engineering, University of New South Wales, Sydney 2052, Australia

<sup>5</sup>Department of Inorganic Materials Science, Faculty of Science and Technology and MESA+ Institute for Nanotechnology, University of Twente, P.O. Box 217, 7500 AE Enschede, The Netherlands

<sup>6</sup>Synchrotron SOLEIL, 91192 Gif-sur-Yvette, France

<sup>7</sup>Université d'Evry, Université Paris-Saclay, Evry, France

*\*These authors contributed equally to this work*

*\*\*e-mail: stephane.fusil@cnrs-thales.fr*

*\*\*\*Now at Department of Physics, JMI, Central University, New Delhi, India*

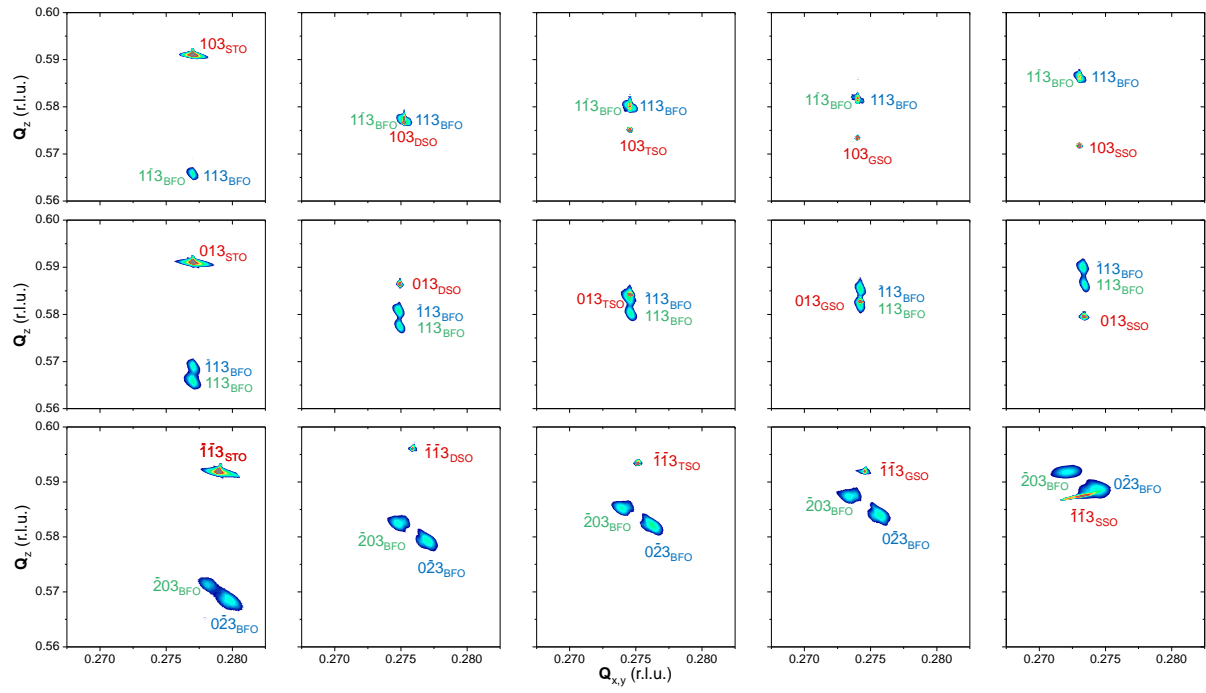

**Supplementary Figure 1. Reciprocal space maps on (103), (013), ( $\bar{1}\bar{1}3$ ) substrate peaks.** BFO, STO, DSO, TSO, GSO and SSO stand for BiFeO<sub>3</sub>, SrTiO<sub>3</sub>, DyScO<sub>3</sub>, TbScO<sub>3</sub>, GdScO<sub>3</sub> and SmScO<sub>3</sub>, respectively. While the red colour label is assigned to the substrate peaks, the green and blue colour labels stand for the two elastic domains of the BiFeO<sub>3</sub> thin films. All the films display similar structural properties despite the large strain variations from SrTiO<sub>3</sub> to SmScO<sub>3</sub>. The r. l. u. units of the in-plane and out-of-plane wavevectors,  $\mathbf{Q}_{x,y}$  and  $\mathbf{Q}_z$ , respectively, stand for reciprocal lattice units.

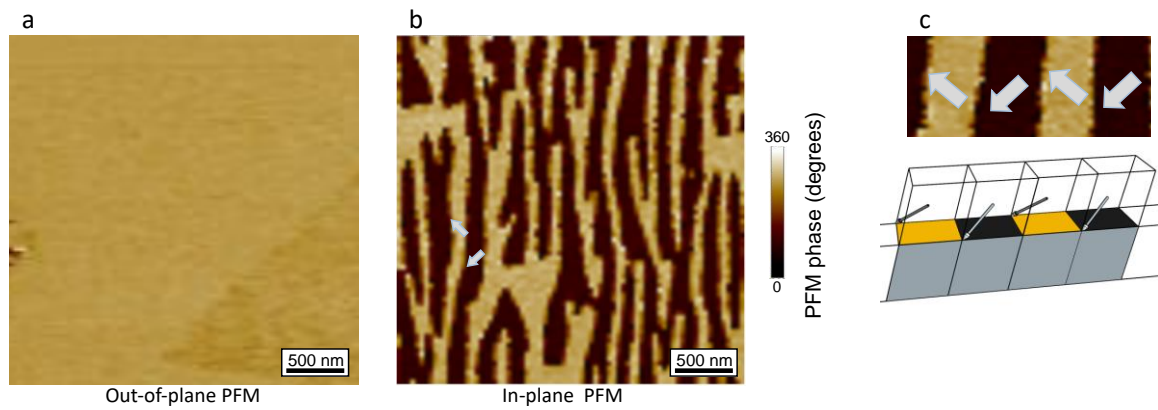

**Supplementary Figure 2. Striped ferroelectric domains in  $\text{BiFeO}_3$  with 71-degree domain walls.** **a**, Out-of-plane PFM phase image of a  $\text{BiFeO}_3$  film grown on  $\text{TbScO}_3(110)$ . The homogeneous bright signal indicates a downward polarisation. **b**, Corresponding in-plane PFM phase image. The striped-domain structure corresponds to two polarisation variants (grey arrows). **c**, Sketch of the 71-degree domain wall structure.

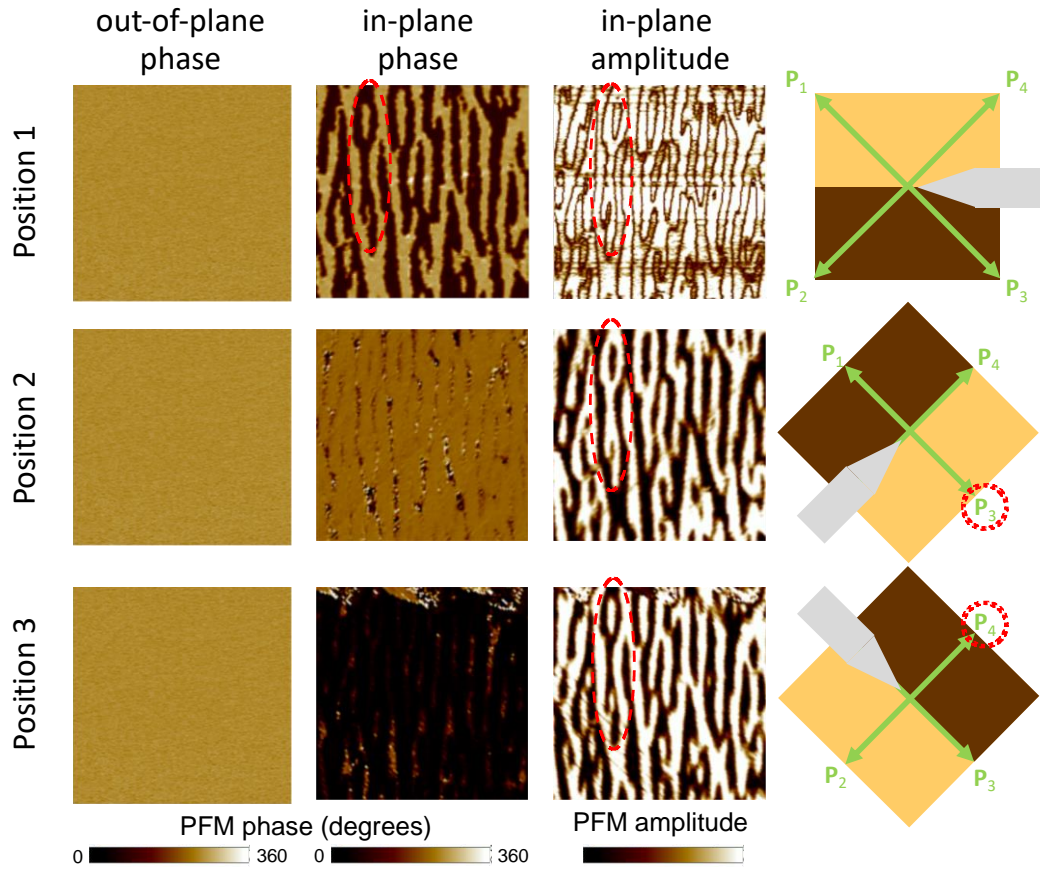

**Supplementary Figure 3. Determining the 71-degree domain walls structure with vectorial piezoresponse force microscopy.** Illustration for BiFeO<sub>3</sub> thin films grown on SrRuO<sub>3</sub>/DyScO<sub>3</sub>(110). In position 1, the cantilever is perpendicular to the ferroelectric stripes. The out-of-plane PFM phase is homogeneous and bright, indicating only downward polarisation variants. The in-plane PFM phase shows alternating bright and dark domains with equal amplitudes. As sketched on the right panel, this could correspond to ( $\mathbf{P}_1$ ,  $\mathbf{P}_4$ ) variants in the bright regions and ( $\mathbf{P}_2$ ,  $\mathbf{P}_3$ ) variants in the dark regions. In position 2, the cantilever is parallel to ( $\mathbf{P}_2$ ,  $\mathbf{P}_4$ ), thus these two variants do not respond. The in-plane PFM phase and amplitude show that only one family of domains responds and its phase signal is thus bright. This signal corresponds to the  $\mathbf{P}_3$  variant (right of the cantilever). In position 3, the cantilever is parallel to ( $\mathbf{P}_1$ ,  $\mathbf{P}_3$ ). The in-plane PFM phase and amplitude show that only one family of domains responds and its phase signal is therefore dark. This signal corresponds to the  $\mathbf{P}_4$  variant (left of the cantilever) and the  $\mathbf{P}_3$  variant does not respond as it is parallel to the cantilever. Putting all this information together allows us to conclude that the striped-domain structure then corresponds to alternated  $\mathbf{P}_3$  and  $\mathbf{P}_4$  domains with 71-degree domain walls. All the PFM images are  $2.5 \times 2.5 \mu\text{m}^2$ . The dashed red line emphasizes the complementarity between each signal in the three different positions.

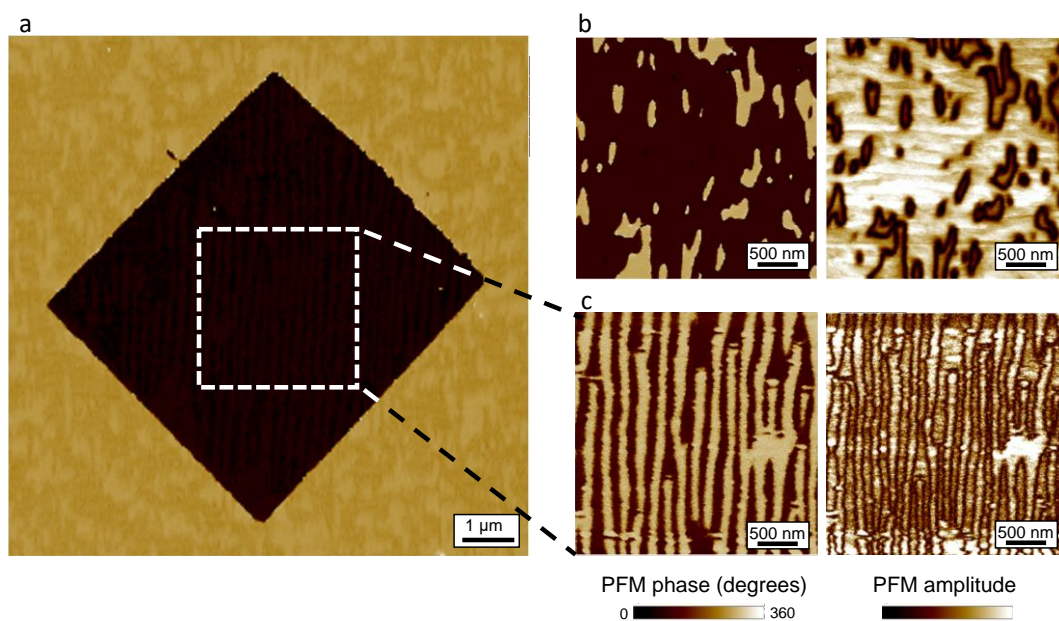

**Supplementary Figure 4. Artificial stripes designed by PFM on BiFeO<sub>3</sub> thin films grown on SrTiO<sub>3</sub>.** **a**, Out-of-plane PFM phase change from domains pointing downwards (bright contrast) to domains pointing upwards (dark contrast). **b,c**, This writing scheme is accompanied by a change in the arrangement of the in-plane polarisation variants from the native mosaic-like pattern (**b**) to a stripe-domain pattern (**c**).

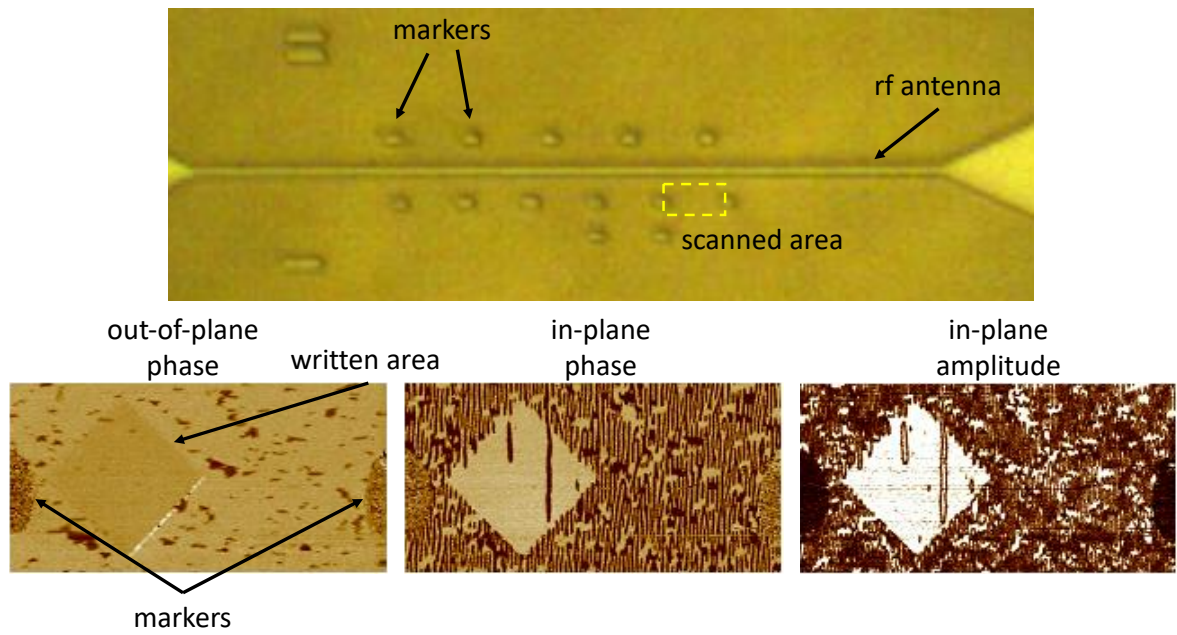

**Supplementary Figure 5. Antenna and markers defined to spatially correlate PFM and NV imaging.**

Antenna and markers defined by laser lithography on the BiFeO<sub>3</sub> samples. (top) Optical microscope image. (bottom)  $17 \times 8.5 \mu\text{m}^2$  PFM images in the scanned area defined by the dashed yellow square.

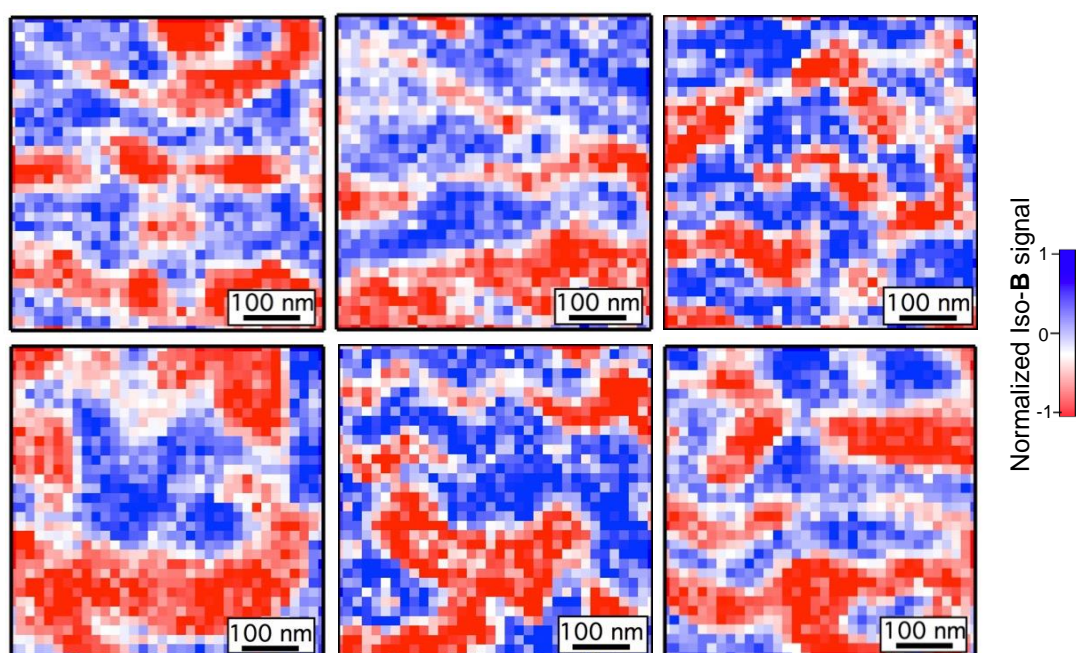

**Supplementary Figure 6. Magnetic textures in BiFeO<sub>3</sub> thin films grown on SmScO<sub>3</sub>.** NV magnetometry images at different locations of the BiFeO<sub>3</sub> film grown on SrRuO<sub>3</sub>/SmScO<sub>3</sub>(110).

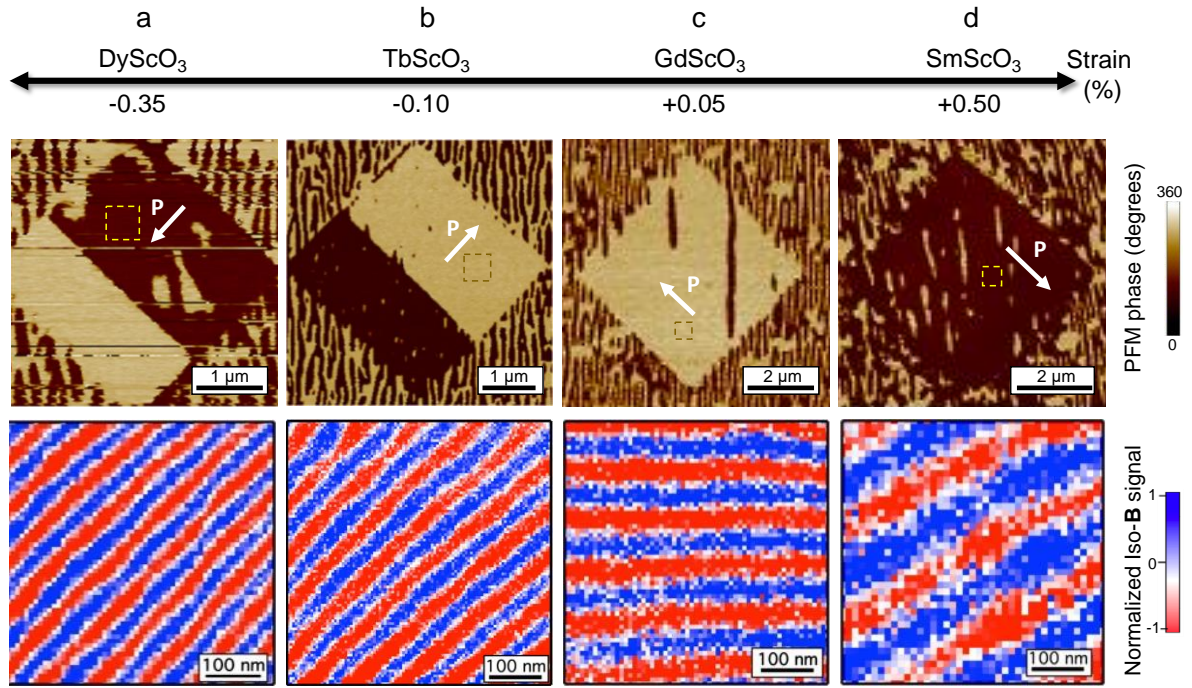

**Supplementary Figure 7. Single ferroelectric domains and the corresponding magnetic textures.** **a-d** (top) In-plane PFM phase images of written areas and (bottom) corresponding NV images for BiFeO<sub>3</sub> films grown on (a) DyScO<sub>3</sub>, (b) TbScO<sub>3</sub>, (c) GdScO<sub>3</sub>, and (d) SmScO<sub>3</sub> substrates. The dashed squares in the PFM images show the sizes of the corresponding NV images.

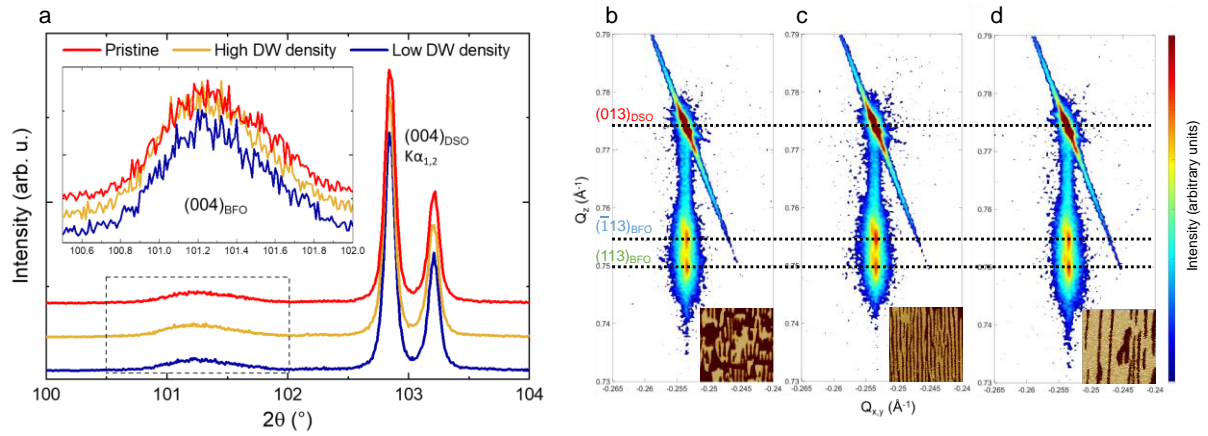

**Supplementary Figure 8. Microdiffraction on pristine and written areas of a  $\text{BiFeO}_3$  thin film grown on  $\text{DyScO}_3$ .** **a**,  $2\theta - \omega$  XRD scans of the (004) peaks and **b-d**, RSMs around the (013) substrate peak collected from a pristine area (**b**), a written area with high domain wall (DW) density (**c**), and a written area with low domain wall density (**d**). The dotted horizontal lines are guides to the eye to aid comparison. The insets in panels (**b-d**) show  $4 \times 4 \mu\text{m}^2$  in-plane PFM phase images of the areas measured by microdiffraction. All three areas show identical structural properties despite the large variations in domain configurations, ruling out strain differences between artificially-written and as-grown striped-domains.
